# Supplementary material for: Glycointeractome of Neisseria gonorrhoeae: Identification of Host Glycans Targeted by the Gonococcus To Facilitate Adherence to Cervical and Urethral Epithelial Cells
Source: PubMed Central journal article supplement (PMC6747729; doi:10.1128/mbio.01339-19), 2019-07-09
Supplement: mBio.01339-19-sf003.pdf [file mBio.01339-19-sf003.pdf]

**The glycointeractome of *Neisseria gonorrhoeae* – identification of host glycans targeted by the gonococcus to facilitate adherence to cervical and urethral epithelial cells**

Evgeny A. Semchenko, Arun V. Everest-Dass, Freda E.-C. Jen, Tsitsi D. Mubaiwa, Christopher J. Day and Kate L. Seib

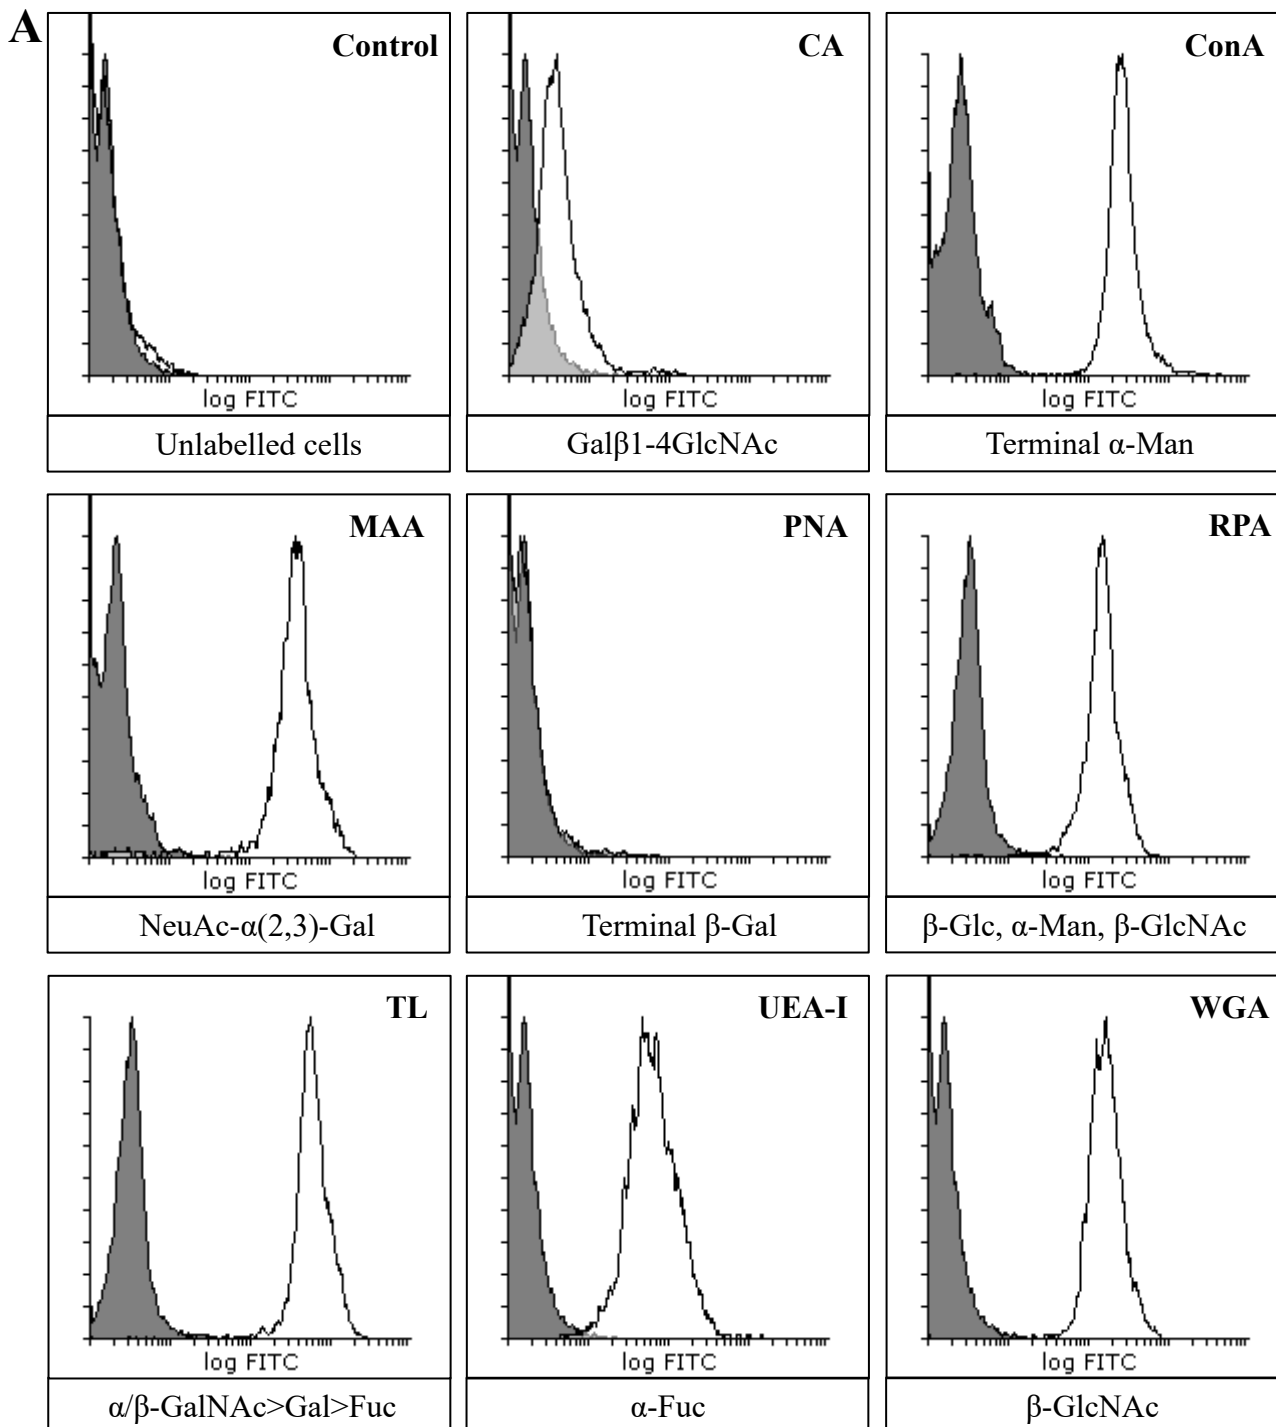

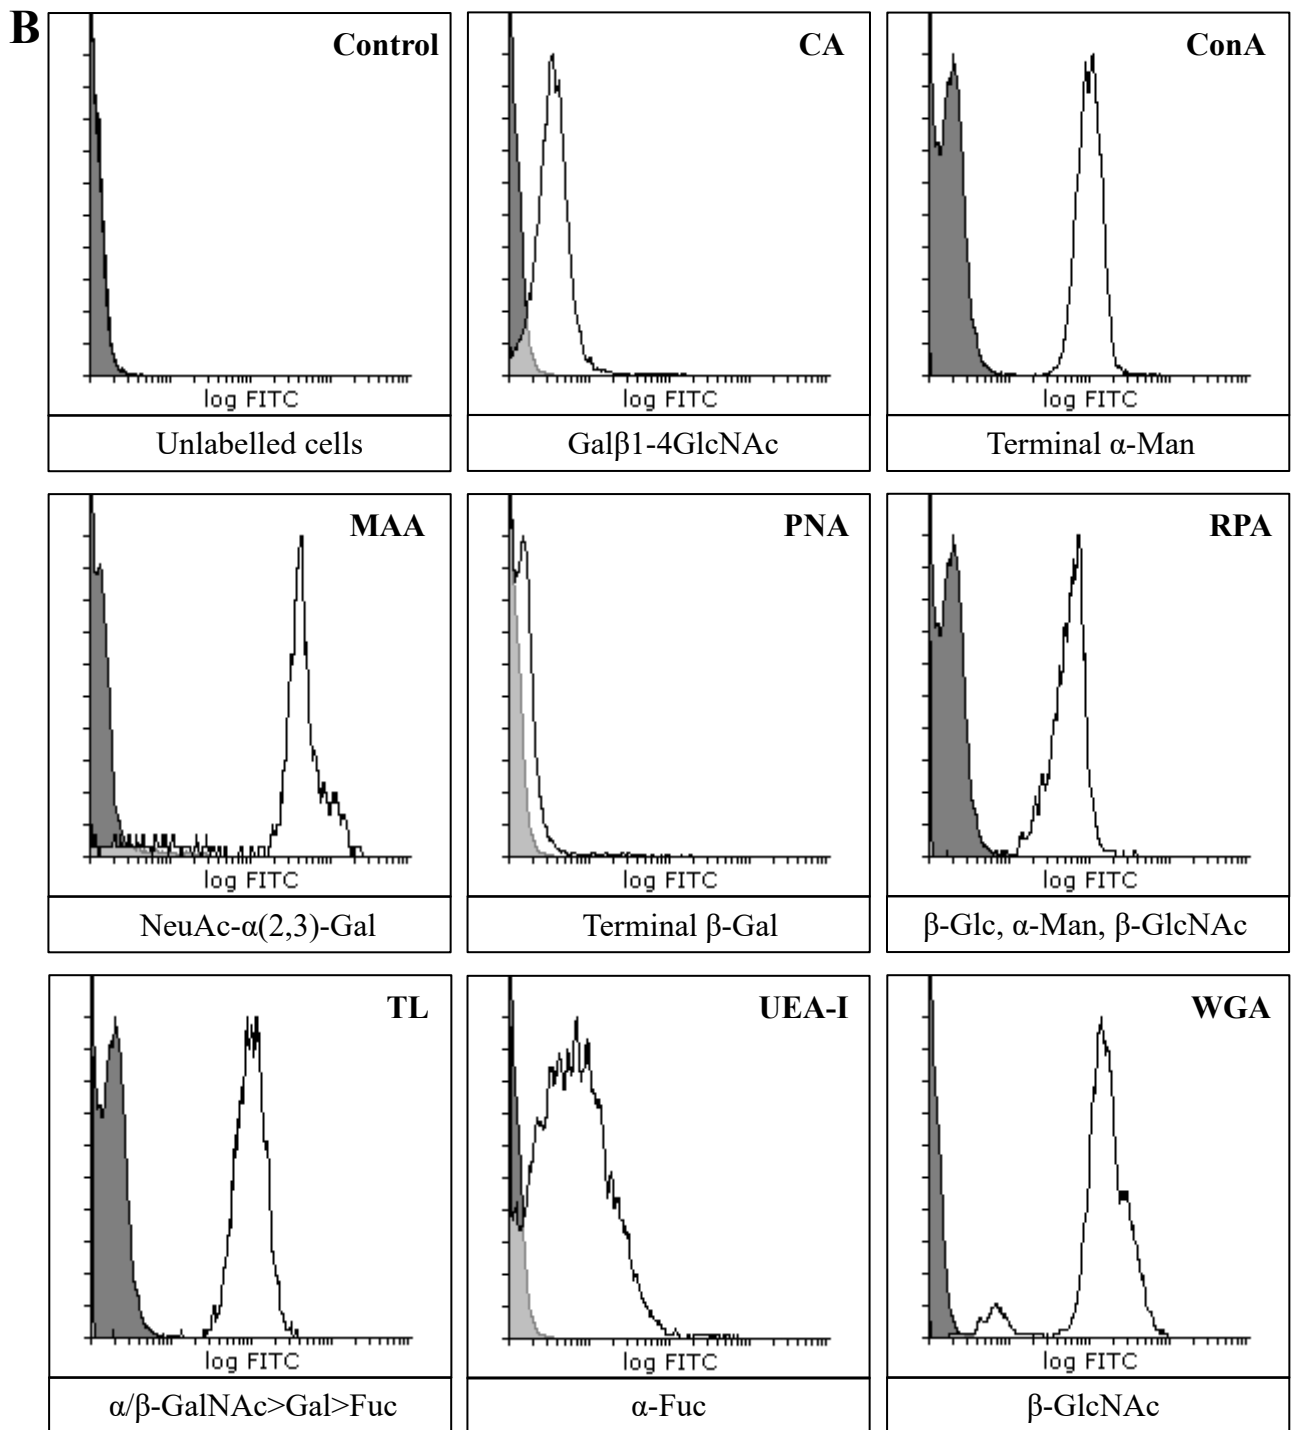

**Figure S3. Analysis of lectin binding by epithelial cells.**

Identification of (A) urethral epithelial cell (tUEC) and (B) cervical epithelial cell (tCX) surface glycans with fluorescein isothiocyanate (FITC) labelled lectins using flow cytometry. Control histogram shows the overlay of the non-labelled cell population and cells incubated with the final elution of the buffer that followed the clean-up of the FITC labelling of lectins. This demonstrates that no unreacted, residual fluorescein molecules were present in any of the lectin samples. Each panel shows a histogram from an individual experiment with a lectin (top right corner) and the glycan it recognises (bottom label). Lectin abbreviations: CA - *Colchicum autumnale* lectin, ConA - *Canavalia ensiformis* lectin, MAA - *Maackia amurensis* lectin, PNA - *Arachis hypogaea* lectin, RPA - *Robinia pseudoacacia* lectin, TL - *Tulipa* sp. lectin, UEA-I - *Ulex europaeus* lectin, WGA - *Triticum vulgare* lectin.
